# Supplementary material for: Salivary glands harbor more diverse microbial communities than gut in Anopheles culicifacies
Source: PubMed Central journal article supplement (PMC4062515; doi:10.1186/1756-3305-7-235), 2014-05-20

## S1: Work Flow (Metagenomics)

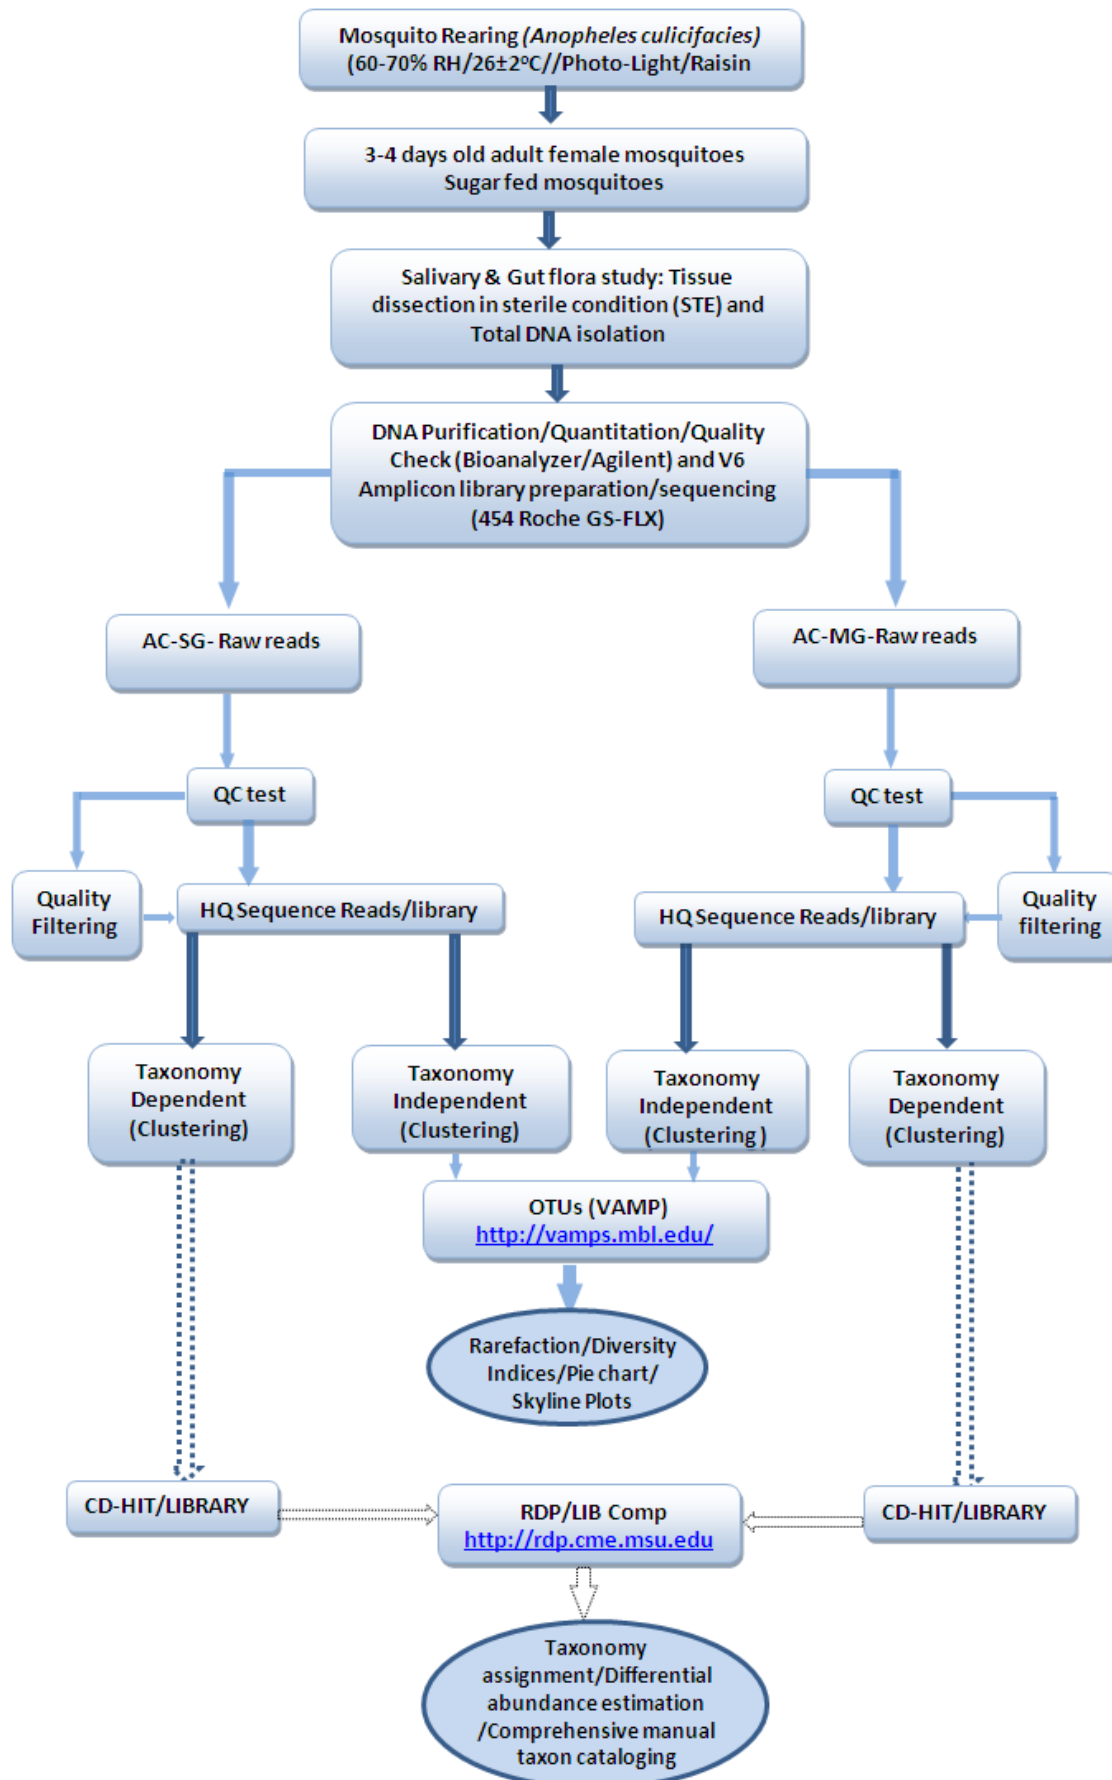

Supplement: 1756-3305-7-235-S1.pdf [file 1756-3305-7-235-S1.pdf]
